# Supplementary material for: HIV infection reveals widespread expansion of novel centromeric human endogenous retroviruses
Source: HighWire-hosted journal article supplement (doi:10.1101/gr.144303.112), 2013-05-08
Supplement: Supplemental_Material.docx [file Supplemental_Material.docx]

**Supplementary Information**

**HIV Infection Reveals Wide-Spread Expansion of Novel Centromeric Human Endogenous Retroviruses**

Rafael Contreras-Galindo1, Mark H. Kaplan1,Shirley He1, Angie C. Contreras-Galindo1, Marta J. Gonzalez-Hernandez1, Ferdinand Kappes2, Derek Dube1, Susana M. Chan1, Dan Robinson3,4, Fan Meng5,6, Manhong Dai5, Scott D. Gitlin1,4,7, Arul M. Chinnaiyan3,4,8, Gilbert S. Omenn9, and David M. Markovitz1,4,10

**Authors’ affiliations**:

1 Department of Internal Medicine, and Programs in Immunology, Cancer Biology, and Cellular and Molecular Biology, University of Michigan, Ann Arbor, MI 48109, USA

2 Institute of Biochemistry and Molecular Biology, Medical School, RWTH Aachen University, Aachen, Germany

3 Michigan Center for Translational Pathology, University of Michigan Medical School, Ann Arbor, MI 48109, USA

4 Comprehensive Cancer Center, University of Michigan Medical School, Ann Arbor, MI 48109, USA

5 Molecular and Behavioral Neuroscience Institute, University of Michigan, Ann Arbor, MI 48109, USA

6 Department of Psychiatry, University of Michigan, Ann Arbor, MI 48109, USA

7 Veteran Affairs Health System, Ann Arbor, MI 48105, USA

8 Howard Hughes Medical Institute

9 Departments of Computational Medicine and Bioinformatics, Internal Medicine, and Human Genetics, and School of Public Health, University of Michigan, Ann Arbor, MI 48109, USA

10 Corresponding Author:

David M. Markovitz

Department of Internal Medicine

Division of Infectious Diseases

University of Michigan, Ann Arbor, MI

48109-5640, USA

Tel# (734) 647-1786

Fax# (734) 764-0101

E-mail: dmarkov@umich.edu

**Supplementary Results**

**Calculation of the integration time of K111**

The best methodology we have to date the integration time of a virus is a comparison of the mutations that differentiate the 5’ and 3’ LTRs. Due to the mechanism of reverse transcription, the sequences of the 5’ and 3’ LTRs are identical at the time of integration, yet accumulate mutations over time. Thus, the age of viral integration can be estimated by comparing the sequence differences of the 5’ and 3’ LTRs, which will accumulate mutations over thousands of years of evolution. It was estimated that HERV-K (HML-2) accumulates mutations at a rate of 2.3 to 5 x 10-9 substitutions per site per year, in other words one mutation every 185,000 to 450,000 years (Turner et al. 2001). The two LTRs of K111 have 28 differences: 27 single base mutations and a single bp insertion. Fourteen of these mutations are common to many HERV-K (HML-2) proviruses, suggesting that they might have arisen from genomic recombination and/or gene conversion involving K111 and other HERV-K (HML-2) proviruses, and did not appear over evolutionary time within the K111 LTRs. The other 14 substitutions likely arose through mutations that occurred to K111 over the course of evolutionary time. The most parsimonious explanation is that after the original K111 inserted into modern humans it underwent mutations making it distinct from the progenitor chimpanzee provirus, spread throughout human centromeres, and then underwent mutagenesis in each individual insertion, thus accounting for the distinctive substitutions seen in the K111 sequences from specific chromosomes. Using this information, we estimated that K111 inserted into the human genome about ~2.6 to 6.3 million years ago (14 mutations x 185,000 – 450,000 years), just before humans split from chimpanzees, an event calculated to have happened less than 6.3 million years ago, consistent with our detection of K111 in a single copy in the chimpanzee. The separation of the gorilla and orangutan from the hominid lineage is an event calculated to have occurred more than 10 million years ago (Scally et al 2012), suggesting that K111 integrated into the hominid lineage after the separation of gorilla and orangutan ancestors.

K111 likely integrated into the hominid lineage before the split of humans and chimpanzees; K111 is not represented in the genomes of gorillas and orangutans. K111 might perhaps have originally been present in the genomes of the gorilla and orangutan, but was subsequently excised. The mechanism that would most likely lead to the elimination of K111 from a primate genome is recombinational deletion between satellite sequences, such as CER:D22Z3 elements, on both sides of the K111 insertion. In fact, this is considered to be a common homogenization mechanism within satellites (Warburton et al. 1993). However, several lines of evidence indicate that K111 is not, and was likely not, present in the genomes of the gorilla and orangutan. First, even though we cannot completely rule out the possibility that the primers used in this study do not recognize K111 variants that might be present in the genome of gorillas and orangutans, this appears to be unlikely as this set of primers was able to amplify distinct K111 variants in human DNA, as well as the single K111 copy found in the genome of the chimpanzee. Therefore, the evidence suggests that the PCR conditions optimized with this set of primers can amplify most K111 variants. Further, had recombination between the 5’ and 3’ LTRs of the provirus, rather between the CER:D22Z3 elements, eliminated K111 insertions, Solo LTRs would have been formed. We did not detect K111 Solo LTRs in the genomes of the gorilla or the orangutan, arguing against recombination within the retroviral insertions themselves. Finally, and perhaps most convincingly, molecular clock sequence analysis of the LTRs revealed that K111 integrated ~2.6 to 6.3 million years ago, an event calculated to have happened after gorillas and orangutans separated from chimpanzees and humans (Scally et al. 2012).

**Supplementary Methods**

**Study Subjects**

Plasma samples were obtained following protocols approved at the University of Michigan and the North Shore University Hospital. Plasma samples were collected from eighteen HIV-1-infected patients. The HIV-1 viral loads in these plasma samples ranged from < 50 to > 106 HIV-1 RNA copies/ml.

This study also included seven HIV-1 negative breast cancer patients, seven HIV-1 negative non-Hodgkin lymphoma patients, seven HIV-1 negative Hodgkin lymphoma patients, and seven control subject donors. Unlike healthy individuals, who typically have very little HERV-K (HML-2) RNA/DNA in their blood, these breast cancer, lymphoma, and HIV-1 patients had HERV-K (HML-2) viral loads within a range of 106 to 107 copies/ml(data not shown; Contreras-Galindo et al. 2008, 2012).

DNA samples from people of diverse origin were obtained from the blood of ninety-six caucasian people (HRC2 Human Random Control DNA panel 2, Sigma-Aldrich) and from DNA extracted using the DNeasy blood and tissue Kit (Qiagen, Valencia, CA) from PBLs of twenty-eight HIV-1 patients and sixty-five cancer patients recruited at the University of Michigan and the North Shore University Hospital.

DNA from New World and Old World monkeys and primates was obtained from Texas Biomedical Research (San Antonio, TX) and met all the requirements of CITES (Convention on International Trade in Endangered Species of Wild Fauna and Flora) and the Department of the Interior, U.S. Fish and Wildlife Service. In addition, DNA from Orangutan and Gorilla was extracted from the stool of animal residents of the Toledo (Ohio) Zoo following protocols approved by the University of Michigan and the Toledo Zoo and kindly provided by Christopher Hanley, DVM Dipl. ACZM, Chief Veterinarian of the Toledo, Ohio Zoo Primate Center.

DNA samples from single human chromosomes were extracted from Human/Rodent somatic hybrid cell lines (GM10027, GM11535, GM11689, GM10611, GM10323 and GM11010) as well as obtained from a human chromosomal DNA mapping panel (NIGMS Human/Rodent Somatic Cell Hybrid Mini Mapping Panel # 2 DNA) at the Coriell Cell Repositories (Camden, NJ).

**PCR amplification of K111-related proviruses**

A full-length proviral genome of K111 and partial genomes of K105 and K112 were amplified from human DNA using the Expand Long Range dNTPack PCR kit (Roche Applied Science, Indianapolis, IN). PCR reactions contained 100 ng genomic DNA, 2.5 mM MgCL2, 500 μM dNTPs, 300 nM of each primer, and 3.5 units of Expand Long Range Enzyme Mix. Solo LTR was amplified using the forward P1 or P7 primers and the reverse P2 primer. The full-length forms of K111 were amplified using either P1 or P7 forward primers, the P2 reverse primer and overlapping primers for the HERV-K (HML-2) *gag*, *pol,* and *env* genes. K112 was selectively amplified by using a primer (P5) that binds to the K112 LTR region, which is otherwise mutated in K111 by a 14 bp insertion. K105 was amplified using a primer (P6) that binds a CER element flanking the K105 3’LTR. K112 and K105 were amplified from human DNA and from the human/rodent somatic cell hybrid (10323), which harbors human chromosome 21 (Coriell Cell Repositories, Camden, NJ). *In silico* distribution of CER elements flanking the K111 insertions were screened using Repeat Masking from the Genetic Information Research Institute. Only partial sequences of K105 (6361 bp) and K112 (2042 bp) proviruses were sequenced for the purpose of these studies. K111-related proviral insertions and Solo LTRs were detected in the DNA of all twenty-eight HIV-1 patients, sixty-five cancer patients and ninety-six Caucasian control subjects. Sequences of proviruses K111, K112, K105 and Solo LTR are deposited in the NCBI database with Accession Numbers (JQ790968 - JQ790992; GU476554 - GU476555).

**Viral RNA and cellular RNA extraction, and RT-PCR of the HERV-K (HML-2) *env* gene**

Plasma samples were treated with 200 U RNAse-free DNAse for 1 h at 37 °C. Viral RNA was extracted using the QIAmp viral RNA Mini Kit following the manufacturer’s instructions (Qiagen, Valencia, CA). Cellular RNA was extracted with the QIAmp RNA blood mini-kit following the manufacturer’s instructions (Qiagen, Valencia, CA) and treated with RNAse-free DNAse as recommend by the manufacturer. The full-length HERV-K (HML-2) *env* gene was amplified using the One-Step RT-PCR kit (Qiagen, Valencia, CA) as described (Contreras-Galindo et al. 2012). PCR was performed to verify the absence of genomic HERV-K (HML-2) DNA; the detection of HERV-K (HML-2) *env* RNA was therefore dependent on the reverse transcription step during RT-PCR amplification. HERV-K (HML-2) *env* sequences found in the plasma of HIV-1, breast cancer, and lymphoma patients are deposited in the NCBI database with the accession numbers DQ360503-DQ360809 and EU308642-EU308718.

**Real-Time qPCR specific for K111**

Titers of K111 cellular DNA, plasma RNA, supernatant RNA, and cellular RNA were measured by qPCR or qRT-PCR using a probe that specifically discriminates the K111 *env* gene from other HERV-K (HML-2) *env* sequences due to a 6 bp mutation (underlined in the probe sequence K111P shown below). The qPCR was performed as described(Contreras-Galindo et al, 2012) using the primers K111F and K111R and the FAM-labeled probe K111P. A reverse transcription step of 30 min at 50 °C was included in RT-PCR reactions. The PCR was carried out in 35 cycles consisting of 15 sec of denaturation at 95 °C and 1 min of annealing/hybridization at 60 °C. The K111 titers were estimated using serial dilutions of K111 *env* DNA cloned in the topo TA vector (Invitrogen, Carlsbad, CA). The specificity of the probe was assessed using viral RNA from plasma samples of HIV-1 patients in whom Type-1 HERV-K (HML-2), including K111 *env* wereamplified and sequenced and breast cancer patients in whom similar Type-1 HERV-K (HML-2) genotypes, except K111, were detected (see Fig. 1A and S1). In spite of the fact that the primers used in the reaction amplify all Type-1 HERV-K (HML-2) present in HIV-1 and cancer patients, as seen when the PCR products are electrophoresed in agarose gels and stained by ethidium bromide, the K111 FAM-labeled probe fluoresces only in Real-Time reactions carried out using either K111 *env* standards or viral RNA from HIV-1-infected individuals, but not from cancer patients or control subjects (see Fig. 1A).

**HIV-1 infection/Tat stimulation of Peripheral Blood Lymphocytes (PBLs) and cell lines**

Whole blood was drawn from healthy volunteers and the PBLs were isolated by Ficoll-Hypaque gradient, separated from monocytes by differential plate adhesion, and grown in RPMI medium supplemented with 10% FBS. Ten million PBLs were infected for one day with 1 mL of ~103 TCID50/ml of the HIV-1 strains ADA, 89.6, BAL, or NL4.3, or, alternatively, stimulated with Tat protein containing the first 86 amino acids (Tat 86: 50 ng/mL ) for 24 h. A3.01, Jurkat, SupT1, and H9 T-cell lines were infected with HIV-1 NL4.3. Stably HIV-1-infected HeLaLAV cells and non-HIV-1 infected HeLa cells were also used in the study. After infection, cells were washed twice and the viruses were propagated for 7 days at 37 °C. Cellular RNA was extracted from unstimulated or Tat-stimulated PBLs, carcinoma cell lines (PA-1, NCCIT, 293T, U937, Jurkat and HeLa), Tat-expressing cell lines (Jurkat Tat, Hltat, and HeLaTatIII), and HIV-1 infected and uninfected cells. DNA was removed from the RNA samples by DNAse treatment and the absence of DNA was confirmed by PCR. Levels of K111 expression were measured by Real-Time RT-PCR as described above. HIV isolates, Tat 86 protein, and Tat-expressing cell lines were obtained from the AIDS Research and Reference Reagent Program, Division of AIDS, NIAID, NIH (Germantown, MD).

**Chromatin Immunoprecipitation (ChIP)**

ChIP assays to assess the association of centromeric proteins and heterochromatic marks with K111 were performed using the ChIP-ITTM Express Enzymatic kit (Active Motif, Carlsbad, CA) following the procedures described by the manufacturer. Briefly, ~ 70-80% confluent HeLa cells grown in 15 cm plates were fixed with 1% paraformaldehyde to cross-link protein to DNA. HeLa cells were lysed and the chromatin was sheared with an enzymatic solution. Chromatin was immunoprecipitated overnight using specific monoclonal antibodies (Abcam, Cambridge, MA) to CENPA (ab13939), CENPB (ab134144), and the hetrochromatic histone mark H3K9Me3 (ab10812), or with non-specific IgG antibodies.

ChIP to assess the effect of Tat on the chromatin associated with K111 was performed according to standard protocols(Yu et al. 2007). The antibodies used in these experiments were specific to the heterochromatic marks H3K9Me3 and H4K20Me3 (Abcam, Cambridge, MA). Briefly, formaldehyde was added to the cells to a final concentration of 1% for 10 min in a shaking platform. The cross-linking was stopped by 1/20V of 2.5 M Glycine. The cells were washed with PBS, harvested in the presence of protease inhibitors, and resuspended in lysis buffer for 10 min. The samples were pelleted, re-suspended in nuclear lysis buffer, and the chromatin sonicated 12 times at power setting 3.5 for 12 sec with a 2 min cool-down between each sonication to produce average fragments between 200 and 500 bp. The chromatin was pre-cleared using a Salmon sperm DNA/Protein A Agarose-50% slurry and incubated with H3K9Me3, H4K20Me3, or non-specific IgG antibodies overnight. Antibody-bound chromatin was purified using protein A/agarose, washed extensively, and reverse-cross-linked. Immunoprecipitated DNA and input DNA (5%) were purified by treatment with RNAse A, and proteinase K, and cleaned using the QiAquick PCR purification kit (Qiagen, Valencia, CA).

Centromere and heterochromatin occupancy on target K111, meaning the K111 sequences bound to the centromeric proteins or heterochromatin histone marks (CENPA, CENPB, H3K9Me3, and H4K20Me3), was measured by qPCR. The fold enrichment was determined based on the cycle differences (ΔCt) between the sample vs control (IgG) or between the Tat-treated vs Tat-untreated samples. The 11-mer alphoid repeat of chromosome 21 (alphoidchr.21) served as a positive control for centromeric sequences, and was amplified with the primers 10-10F and mcbox3R (Nakano et al. 2008). 5S ribosomal DNA served as a negative control in the centromere studies, as this gene localizes to the q arm of chromosome 1. RPL30, an active gene, and MYOD, a silenced gene, serve as specificity controls for heterochromatin studies. Primer sequences used for ChIP are listed below.

**PCR for 5’ and 3’ K111 LTR insertions**

A search for the several K111-related insertions was carried out using DNA from New and Old World monkeys, humans, and human/rodent chromosomal somatic hybrids. K111 insertions were amplified by PCR using the Expand Long Range dNTPack PCR kit (Roche Applied Science, Indianapolis, IN) as described above. K111 5’ and 3’ LTRs and accompanying flanking regions were amplified. The primer targeting the centromeric repeat (CER:D22Z3) should bind to any CER:D22Z3 element that flanks the K111 provirus. However, as the other primer is in the K111 sequence, the PCR reaction will preferentially enrich the shortest amplification product, thus leading to a PCR product generated by the primer binding the CER:D22Z3 element closer to the K111 provirus and not the others. The 5’ flanking K111 insertions were amplified with the primers P1/P7 and P4 and the 3’ flanking K111 insertions were amplified with the primers ET1 and P6 (Fig. 1B). K111 3’ LTR insertions were named K105 3’ LTR based on the sequence of the reverse primer that flanks the 3’ integration sequence of K105. Solo LTRs were amplified with the primers P1/P7 and P2. The PCR was performed using an initial step of 94 °C for 2 min followed by 35 cycles consisting of denaturation at 94 °C for 30 sec, annealing at 55 °C for 30 sec, and extension at 68 °C for 5 min. The amplification products were cloned into the topo TA vector (Invitrogen, Carlsbad, CA) and sequenced. Distribution of the CER:D22Z3 elements that are linked to the K111 5’LTR or the K111 3’ LTR were screened *in silico* using Repeat Masking from the Genetic Information Research Institute. Sequences of K111-related insertions amplified from human DNA and human/rodent somatic chromosomal cell hybrids shown in the Figures 2 and 3 are deposited in the NCBI database with Accession Numbers (JQ790790 - JQ790967).

The primers P1/P4 amplified K111-insertions in several human chromosomes. Detection of many of these insertions was corroborated using the primers P7/P4. K111 amplification products obtained in each human chromosome of a size range between 1.0 and 2.0 Kb were corroborated by direct sequencing and cloning/sequencing. PCR products of more than 2.0 Kb were not analyzed because we observed non-specific amplifications in the mouse and hamster parental cell lines used to create the human/rodent somatic cell hybrids. Specific detection of human chromosomes was corroborated by amplifying chromosome-specific genes located in chromosome 9q (AldoseB), 13q (Factor VII), 14q (α1-Antitrypsin), 21q (Superoxide Dismutase), and 22q (Myoglobin) using primers described below.

***In silico* sequence analysis**

The K111-related LTR sequences obtained in the DNA of human cells, DNA from human/rodent chromosomal cell hybrids, as well as the K111-related *env* sequences obtained in the plasma of HIV-1 patients, were BLASTed to the NCBI database. The sequences were aligned in BioEdit and exported to the MEGA 5 matrix. Phylogenetic trees of the *env* were constructed and corroborated by different methods (neighbor-joining, maximum parsimony, and maximum likelihood), using the statistical bootstrap test (10000 replicates) of inferred phylogeny and the Kimura-2 parameter model(Felsenstein 1985; Hills and Bull 1993). LTR trees were generated using Bayesian inference (MrBayes v 3.2; Huelsenbeck et al. 2001; Ronquist and Huelsenbech 2003) with four independent chains run for at least 1,000,000 generations until sufficient trees were sampled to generate more than 99% credibility. ORFs were calculated using translated-BLAST in the NCBI database. Highlighter plots were generated using the highlighter tool of the Los Alamos HIV sequence database ([www.hiv.lanl.gov](http://www.hiv.lanl.gov)). The frequencies of nonsynonymous substitution per site (*d*N) vs. synonymous substitutions per site (*d*S) of K111-related sequences were calculated using **SNAP** (Synonymous/Non-synonymous Analysis Program) from the Los Alamos HIV sequence database. Statistical significance was determined using the log likelihood Z test, assuming a null hypothesis of *d*N/*d*S = 1, that means the mean *d*N = mean *d*S. The phylogenetic analysis included the sequences K105 3’LTR (Acc. No. AF260253), K112 5’LTR (Acc No. AF260249), and another termed K117 3’ LTR (Acc. No. AF260250). K117 is found in chromosome 21 but has not been assigned to a chromosomal location (Kurdyukov et al. 2001). The potential recombinant Solo LTR sequences were verified and the parent sequences identified using RIP 3.0. This program used a sliding window (200 bp in this study) that moves over an alignment containing the query sequence and all of the possible parental proviruses. Best matches are marked if they are significant by using an internal statistical test.

**Deep-Sequencing**

Healthy fibroblast cells were grown from the splenic tissue harvested from a patient with diffuse large B-cell lymphoma. Free cells from the same spleen were collected after mashing the spleen with a sterile mortar and pestle. These cells were suspended in RPMI media with 10% heat-inactivated fetal calf serum and subjected to Ficoll Hypaque gradient separation. The mononuclear cells obtained were washed 3 times in PBS and then frozen in 10% DMSO. These cells were used to prepare neoplastic cell DNA, which also contains normal lymphocytes as well. The procurement of this splenic tissue was approved by a protocol approved by the Institutional Review Board of the University of Michigan. Genomic DNA was extracted from the above cells using the Qiagen Blood and Cell Culture DNA Midi Kit, with purity confirmed by spectrophotometry. Paired-end libraries were prepared from the genomic DNA samples, and HERV-K (HML-2) elements were enriched for by hybridization with a probe set spanning a consensus sequence of the full-length HERV-K (HML-2) LTR. The hybridized DNAs were then captured, washed, and re-amplified prior to deep-sequencing using the Illumina HiSeq 2000 system.

**Bioinformatics Analyses**

K111 insertions were analyzed in HERV-K (HML-2) LTR-enriched libraries created in our laboratory, and similar sequence reads were analyzed from the dataset generated in the Neanderthal and Denisovan genome projects (Green et al. 2010; Meyer et al. 2012. Noonan et al. 2006; Reich et al. 2010). Sequence reads from Neanderthal and Denisovan were kindly provided by Dr. Martin Kircher (Max Planck Institute for Evolutionary Anthropology, Leipzig, Germany). Sequence analysis of the human DNA libraries created in our studies verified greater than 50% enrichment of HERV-K (HML-2) related sequences utilizing our LTR probe-based enrichment strategy. Sequence reads were aligned to the human reference genome as well as to known human and chimpanzee-specific ERV-K (HML-2) sequences and to K111-related insertion site sequences obtained by PCR (see above) using BOWTIE, allowing no more than 1 bp mismatch. To detect K111 insertions, we screened the libraries for sequence reads that contained 20 bp of the CER:D22Z3 flanking sequence, the GAATTC target site duplication and 20 bp of the K111 LTR, allowing no more than 1 bp mismatch. Sequence reads that matched these three criteria were retained for visual examination. In, addition, we screened for read sequences that uniquely hit each of the K111-related LTRs and their integration sites but did not hit the human reference genome (Supplementary Table 1 and 2). Two types of hit counts are presented in the table: 1) hit counts based on total unique reads, and 2) hit counts based on unique hit location on the target. A relatively conservative criterion of >=5 unique hit locations on target in both control and tumor samples was used to ensure that the identified targets were not due to random sequencing errors.

**Statistical Analysis**

The mean number of K111 RNA or DNA between HIV-1 or Tat treatments and controls were compared using an independent student’s T test for samples exhibiting normally distributed values. The relative enrichment of K111 DNA associated with centromere and pericentromere proteins/marks in ChIP experiments (using IgG as a control antibody) was compared using the student’s T test. Two-tailed *p* values were considered significant at *p* < 0.05.

**Supplementary Figure 1.** Phylogenetic reconstruction of HERV-K (HML-2) sequences found in the plasma of HIV-1-individuals reveals the existence of a unique branch of K111-related viral RNAs. Phylogenetic neighbor-joining cladogram of Type 1 HERV-K (HML-2) *env* sequences amplified from HIV-1 patients that were previously reported (Contreras-Galindo et al. 2012) and are here further analyzed. A cluster of sequences related to the novel HERV-K (HML-2) virus K111 is indicated (grey circle). The cladogram tree is unrooted, with taxa arranged for a balanced shape. The tree was constructed using the Kimura 2-parameter model. The stability of branches was evaluated by bootstrap tests with 10,000 replications. Black circles represent known HERV-K (HML-2) proviruses (Contreras-Galindo et al. 2012; Subramanian et al. 2011). The scale bars represent the nucleotide substitutions per sequence.

**Supplementary Figure 2**. Formation of K111 Solo LTR by recombinatorial deletion of full-length K111 provirus.The flanking LTRs of retroviruses are identical at the time of integration in the genome and accumulate mutations over time. Homologous recombination between the 5’ and 3’ LTRs flanking the provirus and subsequent deletion of the internal region leads to Solo LTR formation (Hughes et al 2004). (A) The clustering between the LTRs from various HERV-K (HML-2) proviruses is shown in a neighbor-joining phylogenetic tree. K111 and K109 Solo LTRs cluster with the 5’ and 3’ LTRs of their respective parental full-length proviruses, indicating that these LTRs arose by recombinational deletion (black circles). (B and C) Recombination plots using the RIP program of parental 5’ and 3’ LTRs from the full-length K111 provirus and the solo LTR of chromosome 22 (B) and chromosome 9 (C). Arrows indicate recombination spots. Three segments of the Solo LTRs (B and C) showed homology with either the 5’ or the 3’ LTRs. The first 190 bp segment of the Solo LTRs is highly similar to the 3’ LTR, whereas a second (260-795) segment resembles the 5’ LTR and the last segment (798-969) resembles the 3’LTR. Two crossover points can be distinguished at positions ~245 and ~829 (arrows). In addition, the Solo LTRs are flanked by GAATTC target site duplications and CER:D22Z3 elements. This demonstrates that both Solo LTR were formed by recombination.

**Supplementary Figure 3.** Chromosomal annotation and highlighter plots of **HERV-K111-related proviruses in the human genome.** (A) Highlighter plot showing the nucleotide differences between a consensus full-length K111 that we derived along with partial proviral sequences reported for the related K105 and K112 insertions(Kurdyukov et al. 2001), and a Solo LTR sequence present in the human genome draft indicated by tick marks. Gray boxes denote areas not sequenced or deleted (internal genes deleted in the Solo LTR). The horizontal top axis indicates nucleotide positions in the HERV-K (HML-2) provirus genome, whereas the bottom axis indicates the nucleotide number position. (B) BLAST analysis of K111-related elements in the human genome was performed using a HERV-K (HML-2) LTR flanked by the target site duplication “GAATTC” and a CER:D22Z3 element. The search retrieved four likely candidates (blue and red marks in the genome map). CER:D22Z3 repeats were previously found by fluorescent in situ hybridization (FISH) and human genome sequencing in the centromere of chromosome 22(Dunham et al. 1999; Metzdorf et al. 1988), which led us to annotate a consensus K111 provirus sequence in the centromere of chromosome 22. Proviruses K105 and K112 were previously mapped in the centromere and pericentromere of chromosome 21, respectively (Kurdyukov et al. 2001). Two Solo LTRs were found in unassigned sequences of BAC clones from chromosomes 9 and 22 (blue marks), likely found from the centromere (Accession numbers AC242255.2 and AL592183.10). Solo LTRs and flanking sequences in chromosomes 9 and 22 are 95% similar. BLAST analysis of CER:D22Z3 elements to unpublished centromeric sequences revealed sequences > 95% similar to CER:D22Z3 elements in several human centromeres. Therefore, sequences 95% similar to CER:D22Z3 elements, in which other potential K111-related proviruses would be predicted to perhaps be found, are shown (black marks).

**Supplementary Figure 4.** Analysis of the K111 5’ and 3’ LTR and flanking CER:D22Z3 integration sequences reveals distinct K111 insertion loci. Highlighter**analyses and phylogenetic reconstruction of K111-related LTRs and flanking sequences.** In the Highlighter plots (left), nucleotide differences between the K111 5’ LTRs (A) or 3’LTRs (B) are indicated by tick marks (Green ticks: A; Red ticks: T; Orange ticks: G Light blue ticks: C). Gray ticks indicate gap sequences. Gray boxes indicate gaps. K111 3’ LTR insertions were named K105 3’ LTR based on the sequence of the reverse primer that flanks the 3’ integration sequence of K105. The top horizontal axis indicates the positions of the flanking sequence CER:D22Z3 and the K111 LTR, whereas the bottom axis indicates the nucleotide number position. Phylograms are indicated on the right.

**Supplementary Figure 5.** Phylogenetic reconstruction of LTR sequences of known HERV-K (HML-2) proviruses and K111-related LTR sequences. At the time of integration, the 5’ and 3’ LTRs of each provirus are identical, thus in a phylogenetic tree the 5’ and 3’ LTRs for each provirus should appear as sister taxa. Our phylogenetic reconstruction of the many LTRs from K111-related proviruses found in human samples and other HERV-K (HML-2) proviruses shows two major branches. One branch represents multiple proviruses that independently infected humans over millions of years, such as K101, K102, K110 and K113 (black). The 5’ and 3’ LTRs of each of these proviruses cluster as sister taxa, and therefore, the observed results can only be explained by the LTRs being copied via duplication during replication at the time of integration. The LTRs of the K111 variants found in the human and the chimp cluster in another branch, suggesting that K111 sequences arose from a common ancestor, likely by recombination. K111 3’ LTR insertions were named K105 3’ LTR based on the sequence of the reverse primer that flanks the 3’ integration sequence of K105. The 5’ LTRs (red) and 3’LTRs (blue) found in human and chimp DNA are shown. The position of the CERV-K111 5’ and 3’ LTR sequences preceding the human 5’ and 3’ LTR sequences in the tree suggests that the CERV-K111 sequence resembles the progenitor K111 provirus. Solo LTR sequences (orange) arose by recombination between the 5’ and 3’ LTRs of a full-length K111 provirus removing internal genes. K111H_5LTR clusters to Solo LTR sequences, as this 5’ LTR sequence contains nucleotide substitutions from a 3’ LTR. As Solo LTR sequences originated by recombination between the 5’ and 3’ LTR, the position of the K111H_5LTR sequence near the Solo LTRs in the tree indicates that this sequence arose from recombination. The tree was generated using Bayesian inference with four independent chains run for at least 1,000,000 generations until sufficient trees were sampled to generate more than 99% credibility.

**Supplementary Figure 6.** Detection of chromosome-specific genes in human/rodent somatic cell hybrids.Genes specific for chromosomes 9, 13, 14, 21, and 22 were amplified by PCR in DNA isolated from human/rodent somatic cell hybrids. Unambiguous amplification of chromosome-specific genes (e.g. Aldose B in chromosome 9 but not in other chromosomes) rules out the possibility of DNA contamination in the somatic-cell hybrid panel.

**Supplementary Figure 7.** Analysis of the K111 5’ LTR and flanking CER:D22Z3 integration sequences amplified from 15 human chromosomes reveals the existence of at least 100 K111 proviruses in the human genome. Highlighter**analyses of K111-related insertions and flanking sequences from human chromosomes.** In the Highlighter plots, nucleotide differences between the K111 5’ LTRs obtained from each human chromosome are indicated by tick marks (Dark blue ticks: C to T transition; Light blue ticks: A to G transition; Pink ticks: transversion; Green ticks: transition or transversion). Gray ticks indicate deleted sequences. Gray boxes indicate gaps. The top horizontal axis indicates the positions of the flanking sequence CER:D22Z3 and the K111 LTR, whereas the bottom axis indicates the nucleotide number position.

**Supplementary Figure 8**. HIV-1-Tat does not significantly affect heterochromatin marks (H3K9Me3 or H4K20Me3) over other (non-HERV-K111) genes tested. ChIP for H3K9Me3 and H4K20Me3 on control HeLa and Tat-expressing cells (HLTat and HeLaTatIII) was carried out. Promoter-specific PCR for a gene with constitutively silenced epigenetic marks, MYOD (A), or one generally not under epigenetic control, RPL30 (B) was performed. No significant decreases in heterochromatic markers were observed between control and Tat-expressing cell lines in three independent experiments. If anything, there was an increase in the heterochromatin marks, in sharp contrast to what is seen with K111 (Fig. 5D).

**Supplementary Figure 9.** Distinct K111 proviruses are activated in HIV-1 infected patients. Phylogenetic reconstruction of K111 *env* RNA sequences amplified from the plasma of 6 HIV-1 patients (blue), and DNA sequences of K111-related proviruses (black). Phylogenetic neighbor-joining tree of HERV-K (HML-2) K111 *env* sequences amplified from HIV-1 patients we previously reported (Contreras-Galindo et al. 2012), and are further analyzed here. The tree is unrooted, with taxa arranged for a balanced shape. The tree was constructed using the Kimura 2-parameter model. The stability of branches was evaluated by bootstrap tests with 10,000 replications. The scale bars represent the nucleotide substitutions per sequence.

**Supplementary Table 1.** Deep-sequencing analysis of K111 insertions found in DNA from healthy splenic fibroblasts and adjacent tumor lymphocytes from a patient with B-cell lymphoma. Genomic DNA samples from a lymphoma tumor and matching fibroblast samples from the spleen of a patient with diffuse large B-cell lymphoma were enriched for HERV-K (HML-2) LTR sequence, and subjected to 100 bp paired-end sequencing on an Illumina HiSeq 2000. Sequence reads were aligned to the human reference genome, related HERV-K (HML-2) sequences, and the K111 sequences we discovered by PCR (Fig. 3) using BOWTIE and allowing no more than 1 bp mismatch. Read sequences that uniquely hit each of the K111 sequences and their integration sites but did not hit the human reference genome are summarized in the table. The K111 insertion column describes K111 polymorphic insertions of different length and sequence found in human DNA (Fig. 2A), as well as the K111 insertions found in each human chromosome (e.g. clones 1A1-1A10 are found in human chromosome 1; Fig. 2B, and Fig. 3). Numbers indicate the chromosome on which the sequence is found based on the PCR results (Fig. 2 and Fig. 3). Two types of hit counts are presented in the table: 1) hit counts based on total unique reads. Each sequence read that meets the above mapping criteria is counted as one. The total number of counts for different targets reflects their abundance in the original samples to a certain degree. However, the total read count may not reflect the original amounts of different targets in the samples accurately due to bias in PCR amplification of the different fragments during the sequencing library preparation process. 2) hit counts based on unique hit location on the target. This is a conservative approach that eliminates the PCR bias since the mapping starting at different locations on the target originates from different cDNA fragments before the PCR amplification step. However, the location-specific counts may underestimate the amount of the original target if unique mapping locations are close to saturation or already saturated. Consequently, if a target has many copies in the human genome, there will be many read fragments originating from different copies that share the same mapping locations. The true number of hits is predicted to be between the two extreme values (hit counts based on unique reads and hit counts based on unique hit location on the target) presented here. Although there is no hard cutoff for presence and absence of the target based on hit counts, a relatively conservative criterion of ≥ 5 unique hit locations on target in both control and tumor samples was used to assure ourselves that the identified targets are not due to random sequencing errors. The relatively high consistency between results generated in the two different samples from the same subject (fibroblasts and lymphoma tissue) supports the validity of the analysis. The table includes the number of read counts that hit human-specific HERV-K (HML-2) insertions (K101, K102, and K103) and the chimpanzee-specific CERV-K OLD3 insertion, with the latter, as expected, not retrieving any hits. No significant differences were found in the number of hit counts between control and tumor cells. These data, obtained using completely different methodology, confirm the findings presented in Figures 2, 3, and S7, showing that a large number of K111 full-length viruses and solo LTRs have spread throughout the human genome.

**Supplementary Table 2.** Detection of K111 insertions in Neanderthal and Denisovan genomes. K111 virus-host junction sequences were identified by analyzing individual paired-end sequence reads using the assembled genome of the Neanderthal (Green et al. 2010) and the Denisovan (Recih et al. 2010). Access to these sequences was provided by Dr. Martin Kircher at the Max Plank Institute for Evolutionary Anthropology, Leipzig, Germany. Sequence reads that contain 20 bp of flanking CER:D22Z3 sequence, the GAATTC target site duplication, and 20 bp of the K111 LTR were retrieved and visually inspected to verify the sequence of the K111 insertion. One sequence read in the Neanderthal genome and twenty-five sequence reads in the Denisovan genome were found. Sequence reads were also aligned to the human reference genome, related HERV-K (HML-2) sequences, and the K111 sequences we discovered by PCR (Fig. 2) using BOWTIE and allowing no more than 1 bp mismatch. Read sequences that uniquely hit each of the K111 insertion sequences but did not hit the human reference genome are summarized in the table. The K111 insertion column describes the closest match to K111 polymorphic insertions of different length and sequence found in human DNA by PCR (Fig. 2A), as well as their chromosomal location in *homo sapiens* (e.g. clone 15A2 is found in human chromosome 15; Fig. 2B). Many of the K111 insertions were identified in independent sequence reads. It is likely that several other K111 insertions were not identified because of the difficulties in sequencing ancient DNA as well as the depth of genome coverage obtained in these studies (Green et al. 2010; Reich et al. 2010). The identification of more K111 insertions in the Neanderthal than in the Denisovan genome may suggest that the expansion of K111 was more active in the evolution of the Neanderthal than in the Denisovan.

**List of Primers**

**ET1**: 5’-GCT GTA GCA GGA GTT GCA TTG-3’

**P1**: 5’-ACA TTC AGA CCA TGG TAG CCG TGT -3’

**P2**: 5’-ACA GTG CTG TGT GGG TCT GAA TGA -3’

**P3**: 5’-TGG TGC CGT AGG ATT AAG TCT CCT-3’

**P4**: 5’-GTA CCT TCA CCC TAG AGA AAA GCC T -3’

**P5**: 5'- TCC AAG GTT TCT GGG AAG GGA AAG A -3'

**P6**: 5'-ATG CGA TCC AAG AAG ACT GCT GCT-3'

**P7**: 5’-TCG TTG CAA TGC TCT GGA ATT C-3’

**K111F**: 5’-AAG AGC ACC AGG ATG CTT AAT GCC-3’

**K111R**: 5’-AGT GAC ATC CCG CTT ACC ATG TGA-3’

**K111P**: 5’-FAM-TGC CGG TCC TAA CAG TAG ACT CAC-BHQ1-3’

**RPL30 pF1**: 5’-CAA GGC AAA GCG AAA TTG GT-3’

**RPL30 pR1**: 5’-GCC CGT TCA GTC TCT TCG ATT-3’

**MYOD pF1**:5’-CCG CCT GAG CAA AGT AAA TGA-3’

**MYOD pR1**: 5’-GGC AAC CGC TGG TTT GG-3’

**AldolaseBF**: 5’-TCA TTG CTT GCT TTC TCA AGC AGG G-3’

**AldolaseBR**: 5’-CAA TGC TTC TCC GTG TTG GAA AGT C-3’

**FactorVIIF**: 5’- CTT GTC CTT TGG ATC AGT CCA CGG A-3’

**FactorVIIR**: 5’- TAA TCC TAG TGG GAC AGG GAC TGG T-3’

**Alpha1-AntitrypsinF**: 5’- CTG GTG ATG CCC ACC TTC CCC TCT C-3’

**Alpha1-AntitrypsinR**: 5’- GTC ACC CTC AGG TTG GGG AAT CAC C-3’

**Superoxide DismutaseF**: 5’- GGA GGT AGT GAT TAC TTG ACA GCC C-3’

**Superoxide DismutaseR**: 5’- ACA GAT GAG TTA AGG GGC CTC AGA C-3’

**MyoglobinF**: 5’- ACT TGA ACT CTA GTC TGG CTG CCC C-3’

**MyoglobinR**: 5’- CAA AGT GGG TGG CAG TCC CCT TTA C-3’

**5SDNA-F1**: 5’- CCG GAC CCC AAA GGC GCA CGC TGG-3’

**5SDNA-R1**: 5’- TGG CTG GCG TCT GTG GCA CCC GCT-3’

**11-10F**: 5’- AGT TTT TAT GGG AAG ACA TTC CCT-3’

**Mcbox-3R**: 5’- CGG GAA TAT CAT CAT CTA AAA TCT-3’

**Supplementary References**

Contreras-Galindo R, Kaplan MH, Contreras-Galindo AC, Gonzalez-Hernandez MJ, Ferlenghi I, Giusti F, Lorenzo E, Gitlin SD, Dosik MH, Yamamura Y, Markovitz DM. 2012. Characterization of human endogenous retroviral elements in the blood of HIV-1-infected individuals. *J. Virol*. **86**: 262-276.

Dunham I, Shimizu N, Roe BA, Chissoe S, Hunt AR, Collins JE, Bruskiewich R, Beare DM, Clamp M, Smink LJ, Ainscough R, Almeida JP, Babbage A, Bagguley C, Bailey J, Barlow K, Bates KN, Beasley O, Bird CP, Blakey S, Bridgeman AM, Buck D, Burgess J, Burrill WD, O'Brien KP, et al.1999. The DNA sequence of human chromosome 22. *Nature* **402**: 489-495.

Felsenstein J. 1985. Confidence limits on phylogenies: an approach using the bootstrap*. Evolution* **39**: 783-791.

Green RE, Krause J, Briggs AW, Maricic T, Stenzel U, Kircher M, Patterson N, Li H, Zhai W, Fritz MH, Hansen NF, Durand EY, Malaspinas AS, Jensen JD, Marques-Bonet T, Alkan C, Prüfer K, Meyer M, Burbano HA, Good JM, Schultz R, Aximu-Petri A, Butthof A, Höber B, Höffner B, Siegemund M, Weihmann A, Nusbaum C, Lander ES, Russ C, Novod N, Affourtit J, Egholm M, Verna C, Rudan P, Brajkovic D, Kucan Z, Gusic I, Doronichev VB, Golovanova LV, Lalueza-Fox C, de la Rasilla M, Fortea J, Rosas A, Schmitz RW, Johnson PL, Eichler EE, Falush D, Birney E, Mullikin JC, Slatkin M, Nielsen R, Kelso J, Lachmann M, Reich D, Pääbo S. 2010. A draft sequence of the Neandertal genome. *Science* **328**:710-722.

Hills D, Bull J. 1993. An empirical test of bootstrapping as a method for assessing confidence in phylogenetic analysis. *Syst. Biol.* **42**: 182-192.

Huelsenbeck JP, Ronquist F, Nielsen R, Bollback JP. 2001. Bayesian inference of phylogeny and its impact on evolutionary biology. *Science* **294**: 2310-2314.

Hughes JF, Coffin JM. 2004. Human endogenous retrovirus K solo-LTR formation and insertional polymorphisms: implications for human and viral evolution. *Proc. Natl. Acad. Sci*. **101**: 1668-1672.

Kurdyukov SG, Lebedev YB, Artamonova II, Gorodentseva TN, Batrak AV, Mamedov IZ, Azhikina TL, Legchilina SP, Efimenko IG, Gardiner K, Sverdlov ED. 2001. Full-sized HERV-K (HML-2) human endogenous retroviral LTR sequences on human chromosome 21: map locations and evolutionary history. *Gene* **273:** 51-61.

Metzdorf R, Göttert E, Blin NA. 1988. A novel centromeric repetitive DNA from human chromosome 22. *Chromosoma* **97**: 154-158.

Meyer M, Kircher M, Gansauge MT, Li H, Racimo F, Mallick S, Schraiber JG, Jay F, Prüfer K, de Filippo C, Sudmant PH, Alkan C, Fu Q, Do R, Rohland N, Tandon A, Siebauer M, Green RE, Bryc K, Briggs AW, Stenzel U, Dabney J, Shendure J, Kitzman J, Hammer MF, Shunkov MV, Derevianko AP, Patterson N, Andrés AM, Eichler EE, Slatkin M, Reich D, Kelso J, Pääbo S. 2012. A high-coverage genome sequence from an archaic Denisovan individual. *Science* **338**:222-226.

Nakano M, Cardinale, S Noskov VN, Gassmann R, Vagnarelli P, Kandels-Lewis S, Larionov V, Earnshaw WC, Masumoto H. 2008. Inactivation of a Human Kinetochore by Specific Targeting of Chromatin Modifiers. *Dev. Cell*. **14**: 507–522.

Noonan JP, Coop G, Kudaravalli S, Smith D, Krause J, Alessi J, Chen F, Platt D, Pääbo S, Pritchard JK, Rubin EM. 2006. Sequencing and analysis of Neanderthal genomic DNA. *Science* **314**:1113-1118.

Reich D, Green RE, Kircher M, Krause J, Patterson N, Durand EY, Viola B, Briggs AW, Stenzel U, Johnson PL, Maricic T, Good JM, Marques-Bonet T, Alkan C, Fu Q, Mallick S, Li H, Meyer M, Eichler EE, Stoneking M, Richards M, Talamo S, Shunkov MV, Derevianko AP, Hublin JJ, Kelso J, Slatkin M, Pääbo S. 2010. Genetic history of an archaic hominin group from Denisova Cave in Siberia. *Nature* **468**:1053-1060.

Ronquist F, Huelsenbeck JP. 2003. MrBayes 3: Bayesian phylogenetic inference under mixed models. *Bioinformatics* **19**: 1572-1574.

Scally A, Dutheil JY, Hillier LW, Jordan GE, Goodhead I, Herrero J, Hobolth A, Lappalainen T, Mailund T, Marques-Bonet T, McCarthy S, Montgomery SH, Schwalie PC, Tang YA, Ward MC, Xue Y, Yngvadottir B, Alkan C, Andersen LN, Ayub Q, Ball EV, Beal K, Bradley BJ, Chen Y, Clee CM, Fitzgerald S, Graves TA, Gu Y, Heath P, Heger A, Karakoc E, Kolb-Kokocinski A, Laird GK, Lunter G, Meader S, Mort M, Mullikin JC, Munch K, O'Connor TD, Phillips AD, Prado-Martinez J, Rogers AS, Sajjadian S, Schmidt D, Shaw K, Simpson JT, Stenson PD, Turner DJ, Vigilant L, Vilella AJ, Whitener W, Zhu B, Cooper DN, de Jong P, Dermitzakis ET, Eichler EE, Flicek P, Goldman N, Mundy NI, Ning Z, Odom DT, Ponting CP, Quail MA, Ryder OA, Searle SM, Warren WC, Wilson RK, Schierup MH, Rogers J, Tyler-Smith C, Durbin R. 2012. Insights into hominid evolution from the gorilla genome sequence. *Nature*. **483**:169-175.

Subramanian RP,Wildschutte JH, Russo C, Coffin JM. 2011. Identification, characterization, and comparative genomic distribution of the HERV-K (HML-2) group of human endogenous retroviruses. *Retrovirology* **8**:90.

Turner G, Barbulescu M, Su M, Jensen-Seaman MI, Kidd KK, Lenz J. 2001. Insertional polymorphisms of full-length endogenous retroviruses in humans. *Curr. Biol*. **11**:1531-1535.

Yu J,  Yu J, Rhodes DR, Tomlins SA, Cao X, Chen G, Mehra R, Wang X, Ghosh D, Shah RB, Varambally S, Pienta KJ, Chinnaiyan AM. 2007. A polycomb repression signature in metastatic prostate cancer predicts cancer outcome. *Cancer Res*. **67**: 10657-10663.
