# Supplementary material for: HIV infection reveals widespread expansion of novel centromeric human endogenous retroviruses
Source: HighWire-hosted journal article supplement (doi:10.1101/gr.144303.112), 2013-05-08
Supplement: Supplemental_Table_1.docx [file Supplemental_Table_1.docx]

Supplementary Table 1

| K111 insertion | Fibroblast hit count based on total unique reads | Tumor hit count based on total unique reads | Fibroblast hit count based on unique hit location on the target | Tumor hit count based on unique hit location on the target |
| --- | --- | --- | --- | --- |
| 1A1 | 40 | 34 | 29 | 20 |
| 1A2 | 534 | 583 | 83 | 89 |
| 1A3 | 1 | 3 | 1 | 3 |
| 1A5 | 40 | 30 | 24 | 23 |
| 1A7 | 3 | 4 | 3 | 4 |
| 1A8 | 2 | 2 | 2 | 2 |
| 1A9 | 4 | 0 | 4 | 0 |
| 1A10 | 38 | 43 | 23 | 29 |
| 1B1 | 22 | 38 | 16 | 21 |
| 1B2 | 3 | 1 | 3 | 1 |
| 1B3 | 10 | 7 | 9 | 6 |
| 1B7 | 3 | 12 | 3 | 12 |
| 4B1 | 0 | 3 | 0 | 3 |
| 4B2 | 0 | 1 | 0 | 1 |
| 4B3 | 1 | 0 | 1 | 0 |
| 7A3 | 60 | 29 | 14 | 13 |
| 7A4 | 12 | 23 | 9 | 14 |
| 7A6 | 1349 | 1497 | 30 | 38 |
| 9A1 | 32 | 16 | 15 | 11 |
| 9A2 | 6 | 13 | 5 | 13 |
| 9A4 | 479 | 369 | 12 | 10 |
| 9A5 | 7 | 6 | 6 | 6 |
| 9A6 | 17 | 16 | 10 | 10 |
| 12A1 | 2 | 1 | 2 | 1 |
| 12A2 | 224 | 221 | 85 | 81 |
| 12A3 | 9 | 9 | 9 | 9 |
| 12A4 | 1 | 1 | 1 | 1 |
| 12A5 | 24 | 32 | 17 | 22 |
| 12A6 | 75 | 78 | 39 | 40 |
| 12A7 | 2189 | 1984 | 9 | 9 |
| 12A8 | 0 | 2 | 0 | 2 |
| 12B1 | 0 | 2 | 0 | 0 |
| 12B4 | 3 | 0 | 3 | 0 |
| 13A3 | 74 | 52 | 57 | 38 |
| 13A5 | 1257 | 1422 | 57 | 46 |
| 13A6 | 23 | 25 | 20 | 18 |
| 14A1 | 2 | 3 | 2 | 2 |
| 15A1 | 1596 | 1812 | 18 | 24 |
| 15A2 | 31 | 22 | 15 | 13 |
| 15A5 | 580 | 398 | 22 | 20 |
| 15A7 | 1 | 4 | 1 | 4 |
| 17A1 | 71 | 72 | 46 | 56 |
| 17A2 | 6 | 9 | 5 | 6 |
| 17A4 | 25 | 24 | 1 | 3 |
| 17A5 | 25 | 18 | 20 | 13 |
| 17A6 | 6 | 4 | 3 | 2 |
| 18A2 | 2017 | 1729 | 85 | 77 |
| 18A3 | 1088 | 864 | 15 | 18 |
| 18A4 | 5328 | 4904 | 34 | 32 |
| 20A2 | 72 | 53 | 49 | 33 |
| 20A3 | 1 | 1 | 1 | 1 |
| 20A4 | 13 | 15 | 12 | 13 |
| 20A5 | 65 | 54 | 44 | 43 |
| 20A6 | 8 | 7 | 7 | 6 |
| 20A7 | 3390 | 4096 | 44 | 48 |
| 21A4 | 1020 | 1044 | 15 | 16 |
| 21A5 | 54823 | 46985 | 53 | 56 |
| 21A6 | 0 | 1 | 0 | 1 |
| 21A7 | 1 | 0 | 1 | 0 |
| 21A10 | 8 | 6 | 5 | 6 |
| 21A11 | 42 | 41 | 22 | 22 |
| 21B1 | 286 | 246 | 26 | 28 |
| 21B2 | 3 | 2 | 3 | 2 |
| 21B3 | 27 | 19 | 14 | 15 |
| 21B6 | 12 | 11 | 12 | 10 |
| 21B7 | 3 | 1 | 3 | 1 |
| 21B8 | 49 | 35 | 29 | 28 |
| 21B9 | 14 | 19 | 12 | 15 |
| 22A1 | 1590 | 1735 | 14 | 11 |
| 22A2 | 5 | 5 | 4 | 3 |
| 22A4 | 64 | 50 | 36 | 31 |
| 22A6 | 32 | 40 | 23 | 30 |
| 22A7 | 4 | 0 | 1 | 0 |
| 22A8 | 1 | 3 | 1 | 2 |
| 22A10 | 296 | 174 | 52 | 41 |
| 22B3 | 13174 | 11927 | 60 | 61 |
| 22B8 | 100 | 109 | 48 | 51 |
| XA9 | 20 | 9 | 11 | 7 |
| XA11 | 1575 | 1706 | 14 | 14 |
| YA7 | 12 | 11 | 10 | 9 |
| YA9 | 7 | 7 | 3 | 5 |
| YA10 | 3189 | 3419 | 50 | 55 |
| YA12 | 16 | 26 | 1 | 1 |
| S15A1 | 1 | 3 | 1 | 3 |
| S15A2 | 7 | 10 | 1 | 1 |
| S15B1 | 1303 | 1347 | 55 | 55 |
| S15B2 | 16 | 10 | 14 | 9 |
| S15B3 | 13 | 21 | 12 | 12 |
| S15B4 | 2 | 7 | 2 | 7 |
| S15B5 | 1130 | 1171 | 17 | 21 |
| S22A1 | 3330 | 2721 | 39 | 39 |
| S22B3 | 27 | 17 | 21 | 15 |
| S22B4 | 15 | 18 | 13 | 15 |
| S22B5 | 44 | 53 | 29 | 30 |
| AF260253 K105 | 3940 | 3419 | 89 | 83 |
| K105 C 3LTR | 173 | 281 | 35 | 73 |
| K105 F 3LTR | 19 | 23 | 14 | 11 |
| K105 H 3LTR | 21744 | 19955 | 154 | 141 |
| K105 J 3LTR | 588 | 805 | 102 | 103 |
| K105 K 3LTR | 867 | 1252 | 72 | 68 |
| K111 A 3LTR | 3801 | 3158 | 19 | 20 |
| K111 B 3LTR | 6716 | 7005 | 195 | 190 |
| K111 C 5LTR | 22 | 11 | 20 | 9 |
| K111 D 5LTR | 76 | 260 | 31 | 27 |
| K111 F 5LTR | 1518 | 1776 | 27 | 25 |
| K111 E 5LTR | 6 | 6 | 4 | 4 |
| K111 G 5LTR | 5 | 8 | 5 | 8 |
| K111 solo LTR | 1761 | 2298 | 263 | 237 |
| HERV-K101 | 760766 | 674241 | 688 | 689 |
| HERV-K102 | 549626 | 509036 | 676 | 666 |
| HERV-K103 | 121293 | 112816 | 580 | 506 |
| CERV-K OLD3 | 0 | 0 | 0 | 0 |
