# Supplementary material for: HIV infection reveals widespread expansion of novel centromeric human endogenous retroviruses
Source: HighWire-hosted journal article supplement (doi:10.1101/gr.144303.112), 2013-05-08
Supplement: Supplemental_Table_2.docx [file Supplemental_Table_2.docx]

| K111 insertion | Denisovan hit count based on unique hit location on the target | Neanderthal hit count based on unique hit location on the target |
| --- | --- | --- |
| 15A2 | 0 | 1 |
| 17A1 | 0 | 1 |
| 18A2 | 0 | 6 |
| 21A5 | 1 | 0 |
| 1A2 | 0 | 1 |
| YA8 | 8 | 2 |
| K111E_5LTR | 44 | 9 |
| K111F_5LTR | 9 | 2 |

Supplementary Table 2
